# Supplementary material for: Protein disulfide isomerase-mediated apoptosis and proliferation of vascular smooth muscle cells induced by mechanical stress and advanced glycosylation end products result in diabetic mouse vein graft atherosclerosis
Source: PubMed Central journal article supplement (PMC5520728; doi:10.1038/cddis.2017.213), 2017-05-25

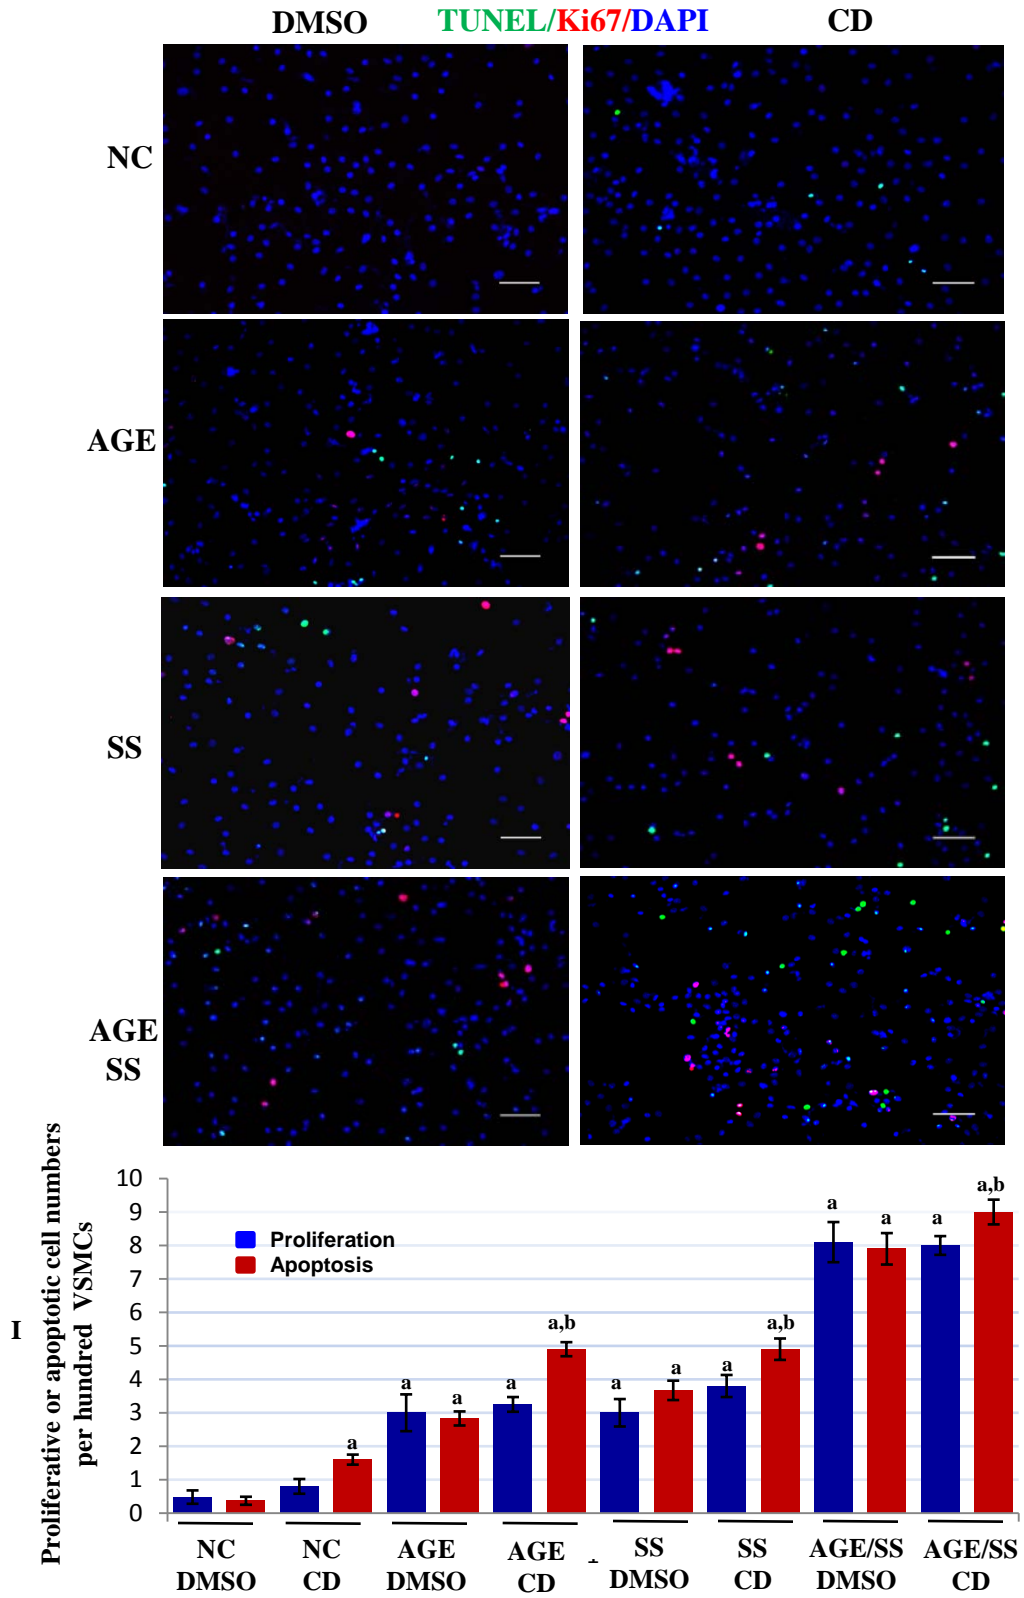

Supplement: cddis2017213x2.pdf [file cddis2017213x2.pdf]
